# Supplementary material for: Activation of NOD1 on tumor-associated macrophages augments CD8+ T cell–mediated antitumor immunity in hepatocellular carcinoma
Source: PubMed Central journal article supplement — Sci Adv. 2024 Oct 2;10(40):eadp8266. doi: 10.1126/sciadv.adp8266 (PMC11446285; doi:10.1126/sciadv.adp8266), 2024-10-02
Supplement: sciadv.adp8266_sm.pdf [file sciadv.adp8266_sm.pdf]

Supplementary Materials for  
**Activation of NOD1 on tumor-associated macrophages augments CD8<sup>+</sup> T  
cell-mediated antitumor immunity in hepatocellular carcinoma**

Feng Zhang *et al.*

Corresponding author: Si Zhang, zhangsi@fudan.edu.cn; Ling Dong, dong.ling@zs-hospital.sh.cn;  
Ruyi Xue, xue.ruyi@zs-hospital.sh.cn

*Sci. Adv.* **10**, eadp8266 (2024)  
DOI: 10.1126/sciadv.adp8266

**This PDF file includes:**

Figs. S1 to S18  
Tables S1 and S2

Fig. S1

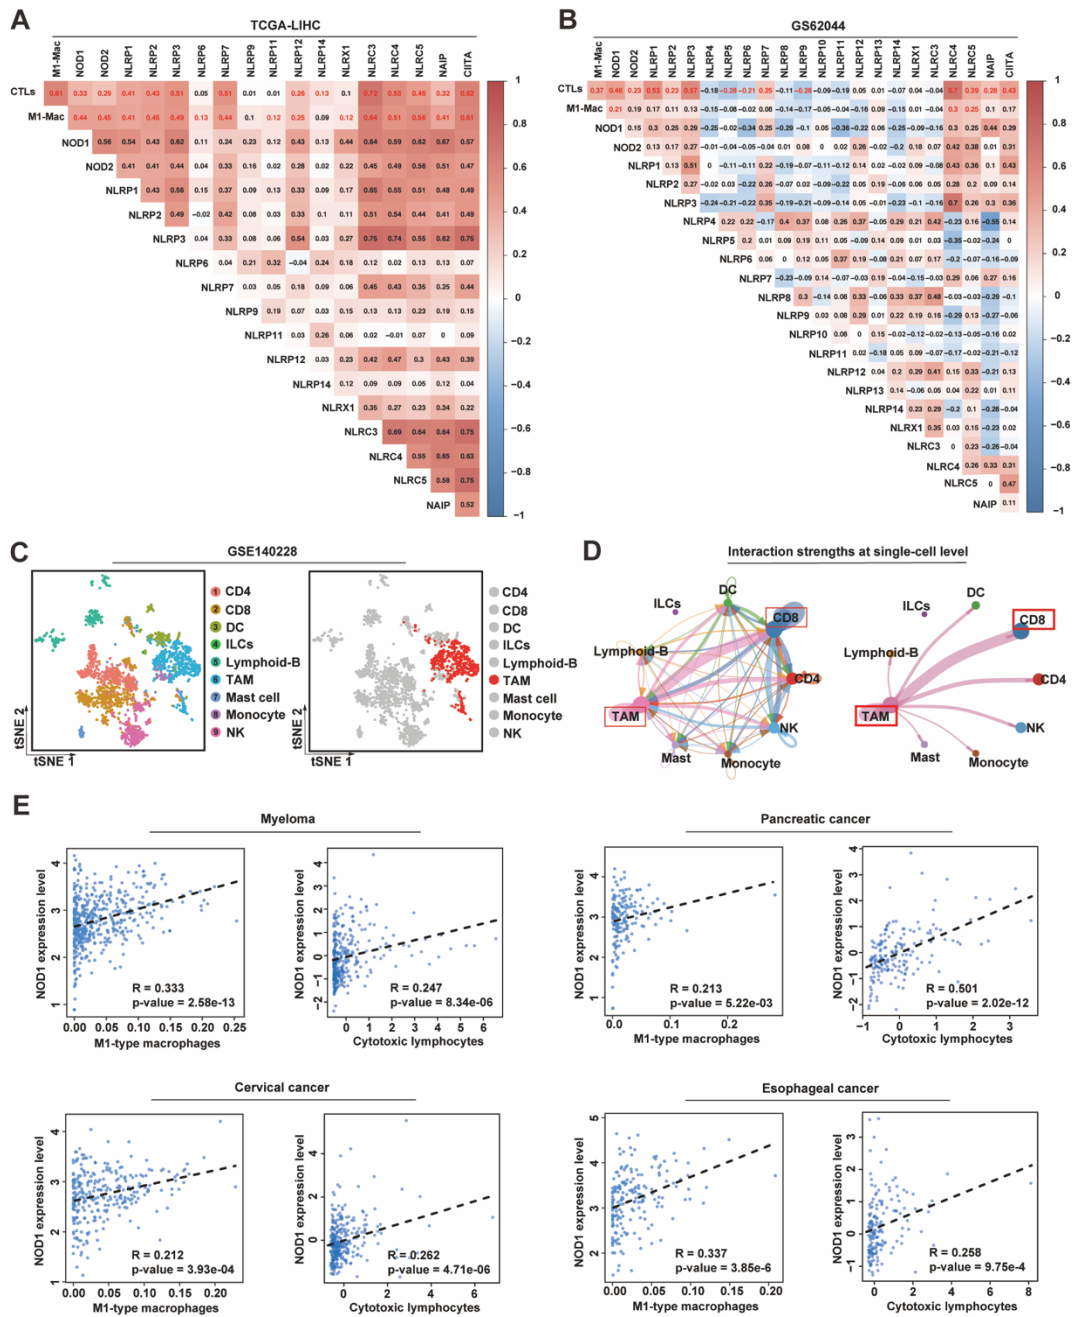

**Fig. S1. Integrated transcriptome analyses unveil the involvement of NOD1 in anti-tumor immunity.** (A-B) Heatmaps displaying spearman correlations among NLRs, M1-type macrophages, and CTLs in HCC patients from the TCGA-LIHC (A) and GEO (GSE62044) (B) datasets. (C-D) Single-cell analysis of tumor samples from HCC patients (GSE140228). tsNE plot illustrating distinct cell subsets (A, left panel), with the TAM population highlighted in red (A, right panel).

Cell-cell communication network identified by CellChat, where nodes represent cell types and edges represent ligand-receptor interaction strength (B). (E) Scatterplot results from the spearman correlation analysis of NOD1 expressions with M1-type macrophages or CTL infiltrations across diverse cancer patients. HCC: hepatocellular carcinoma; tSNE: t-Distributed Stochastic Neighbor Embedding; TAM: tumor-associated macrophage; NLRs: NOD-like receptors; CTLs: cytotoxic T lymphocytes; TCGA-LIHC: The Cancer Genome Atlas Liver Hepatocellular Carcinoma; GEO: Gene Expression Omnibus; DC: dendritic cell; ILC: innate lymphoid cell; NK: natural killer.

Fig. S2

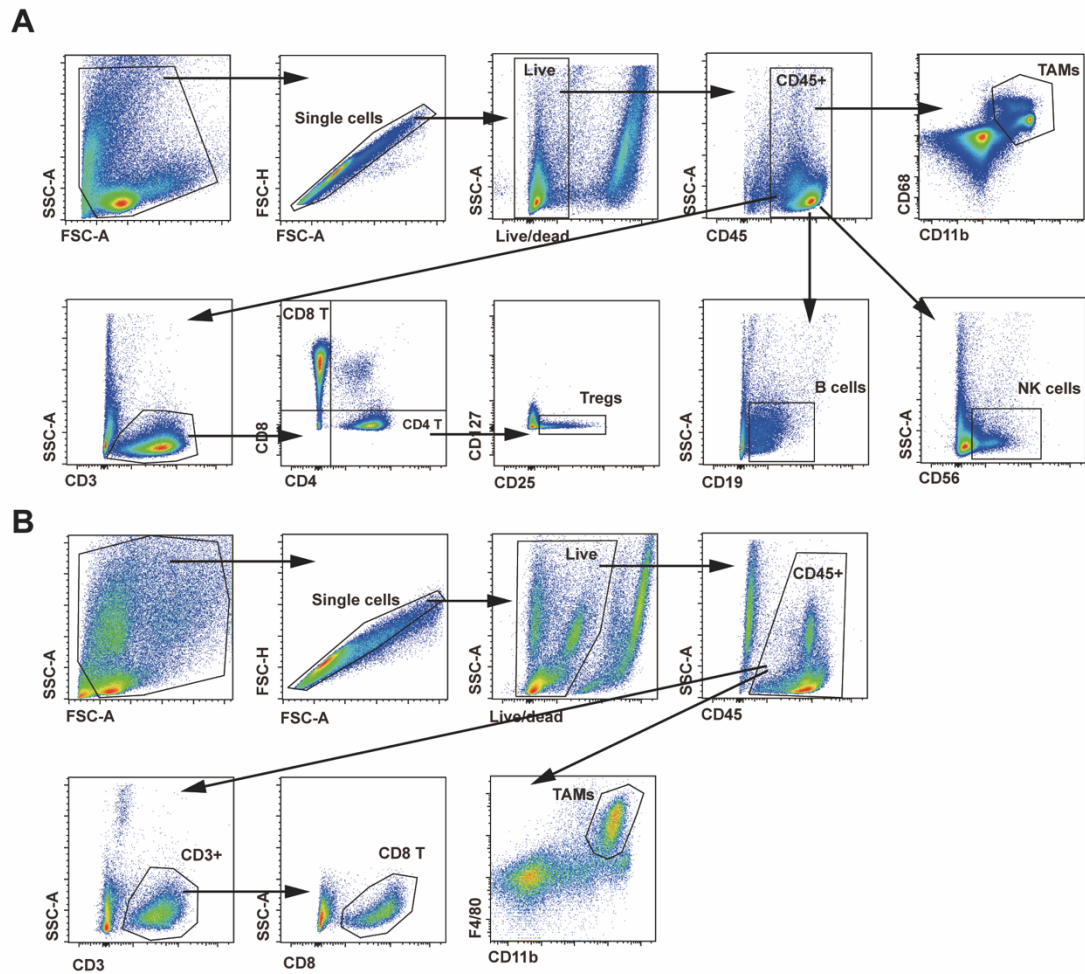

**Fig. S2. Gating strategies used for cell sorting and flow cytometric analysis. (A)** Gating strategy for analyzing TAMs, CD8<sup>+</sup> T-cells, Tregs, B cells and NK cells in tumor samples from HCC patients. (B) Gating strategy for analyzing TAMs and CD8<sup>+</sup> T-cells in murine tumor samples. TAM: tumor-associated macrophage; NK: natural killer; SSC-A: side scatter area; FSC-A: forward scatter area; FSC-H: forward scatter height.

Fig. S3

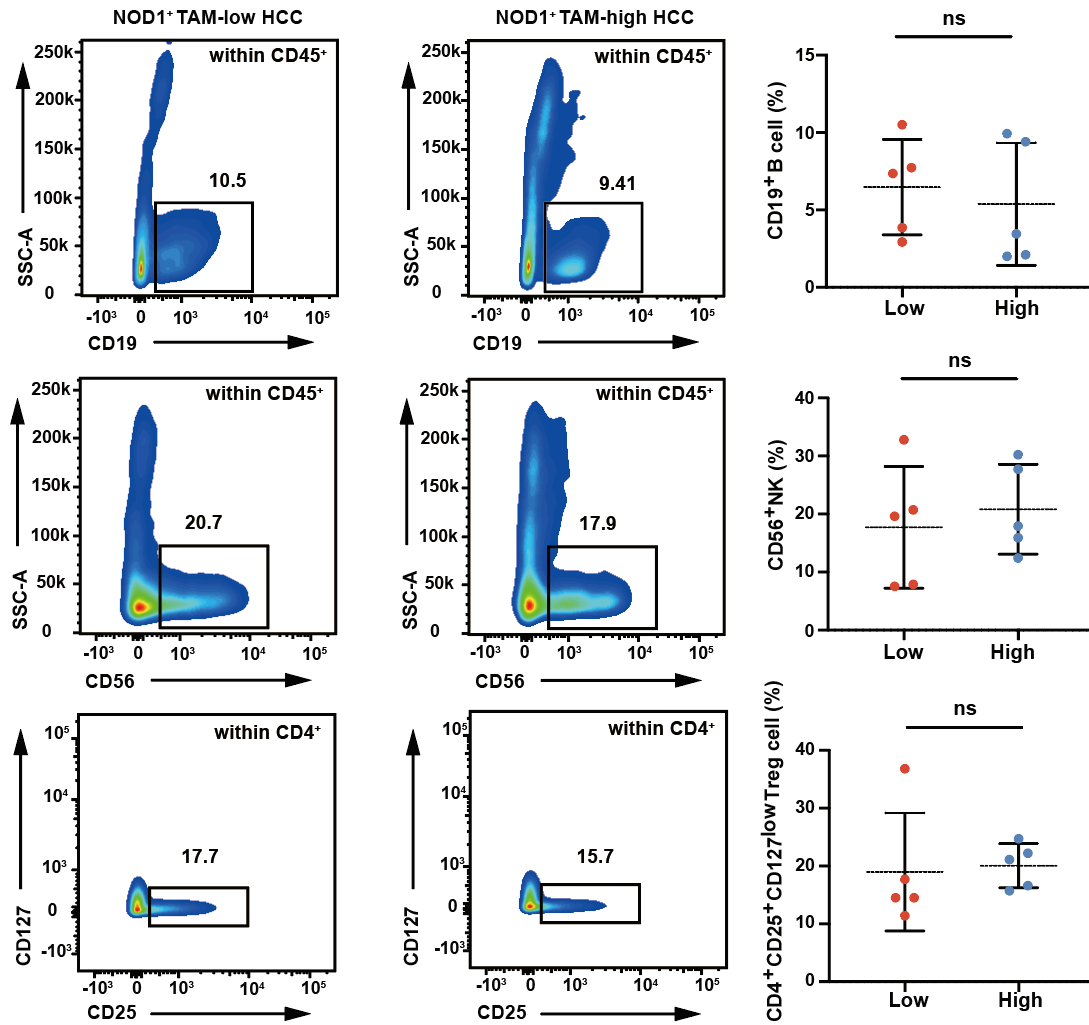

**Fig. S3.** Flow cytometric analysis of B cells, NK cells, and Tregs in human HCC samples. The proportions of CD19<sup>+</sup> B cells, CD56<sup>+</sup> NK cells, and CD4<sup>+</sup> CD25<sup>+</sup> CD127<sup>low</sup> Tregs were compared in HCC samples with low- and high-NOD1<sup>+</sup> TAMs (n=10). Statistical analysis was performed using the Student's t-test. Data was presented as mean with SD. ns, no significance. HCC: hepatocellular carcinoma; NK: natural killer; TAM: tumor-associated macrophage; SSC-A: side scatter area; SD: standard deviation.

Fig. S4

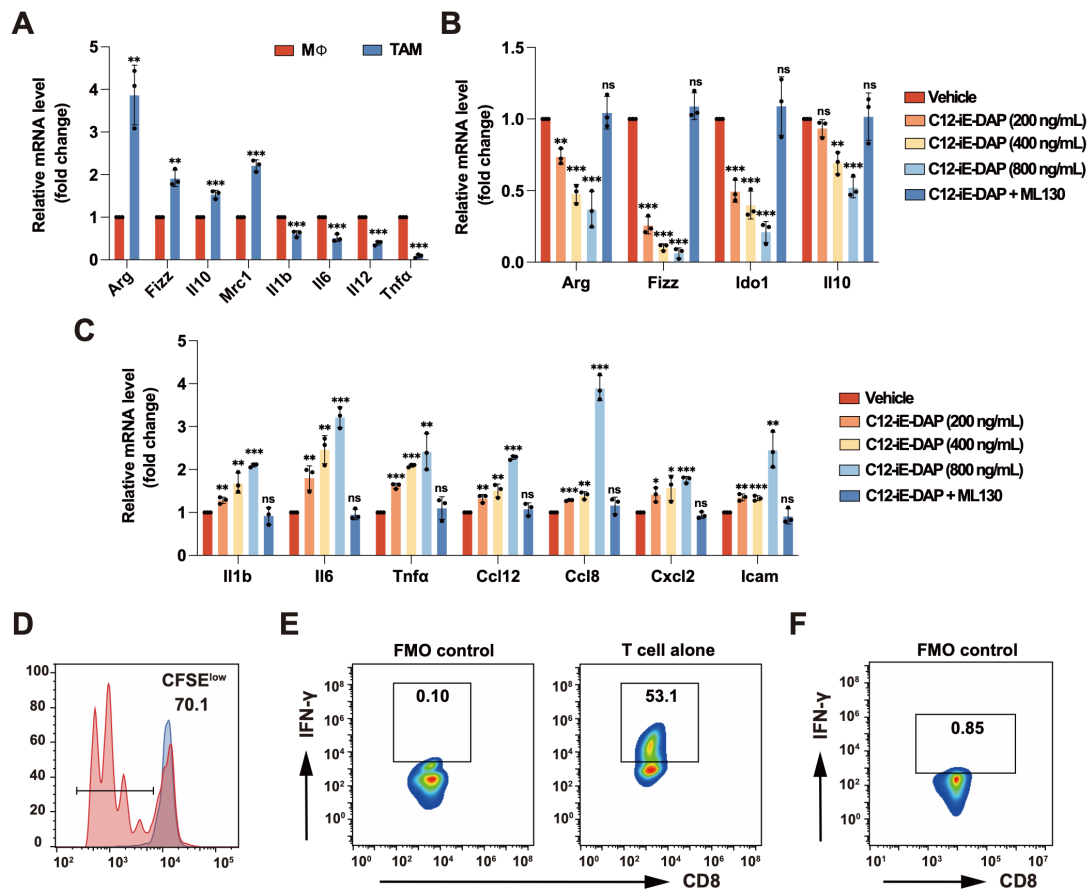

**Fig. S4. NOD1 activation induces TAMs to acquire an immunostimulatory phenotype.** (A) qPCR analysis of the mRNA levels of immune-regulatory genes in MΦ (untreated BMDMs) versus TAMs (TCM-educated BMDMs). (B) mRNA levels of immune-suppressive genes in TAMs treated with either C12-iE-DAP, C12-iE-DAP + ML130, or vehicle. (C) mRNA levels of immune-stimulatory genes in TAMs treated with either C12-iE-DAP, C12-iE-DAP + ML130, or vehicle. (D) Positive control for the T-cell proliferation assay. The percentage of CFSE low population for CD3/CD28 stimulated CD8<sup>+</sup> T cells without BMDMs is shown. (E) FMO control (left panel) and positive control (CD3/CD28 stimulated CD8<sup>+</sup> T cells alone, right panel) for flow cytometry analysis of co-cultured IFN-γ<sup>+</sup> CD8<sup>+</sup> T cells. (F) FMO control for flow cytometry analysis of co-cultured IFN-γ<sup>+</sup> OT-I CD8<sup>+</sup> T cells. Statistical analysis was performed using the Student's t-test. Data was

presented as mean with SD. ns, no significance; \* $p < 0.05$ , \*\* $p < 0.01$ , \*\*\* $p < 0.001$  (vs. vehicle). TAM: tumor-associated macrophage; TCM: tumor condition medium; BMDM: bone marrow-derived macrophage; CFSE: carboxyfluorescein succinimidyl ester; FMO: fluorescence minus one; IFN- $\gamma$ : interferon- $\gamma$ ; SD: standard deviation.

Fig. S5

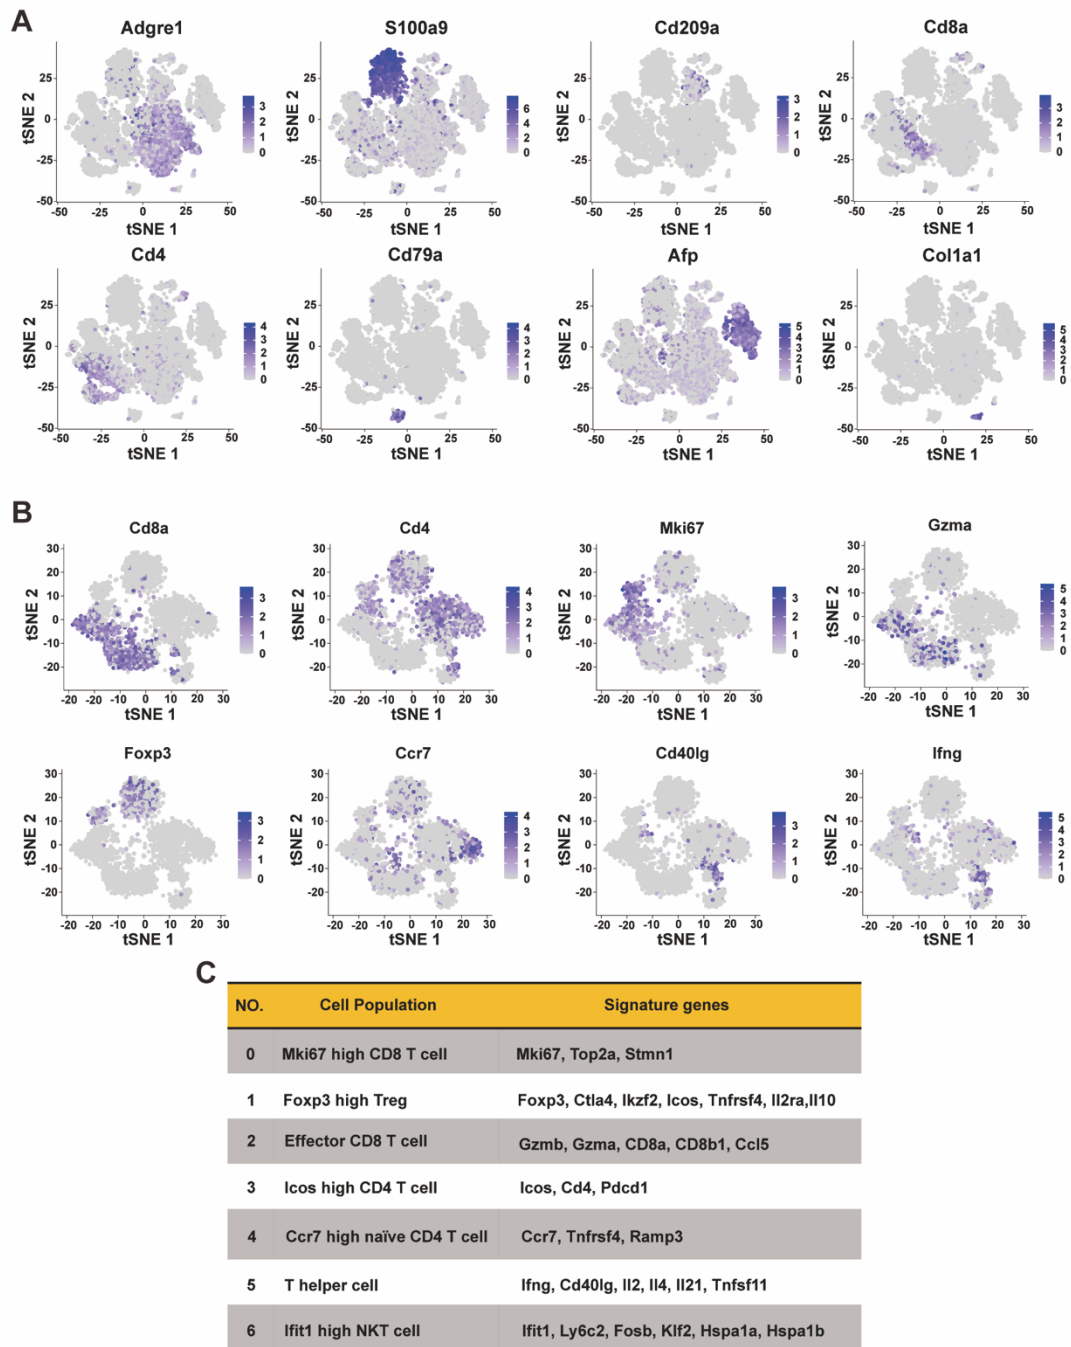

**Fig. S5.** The scRNA-seq analysis of murine orthotopic HCC treated with either vehicle or C12-iE-DAP. (A) tSNE plots showing the expression of cell markers for CD45<sup>+</sup> cells. (B) tSNE plots showing the expression of cell markers for T-cells. (C) Signature genes of identified clusters of T-cells. scRNA-seq: single-cell RNA sequencing; HCC: hepatocellular carcinoma; tSNE: t-Distributed Stochastic Neighbor Embedding.



**Fig. S6**

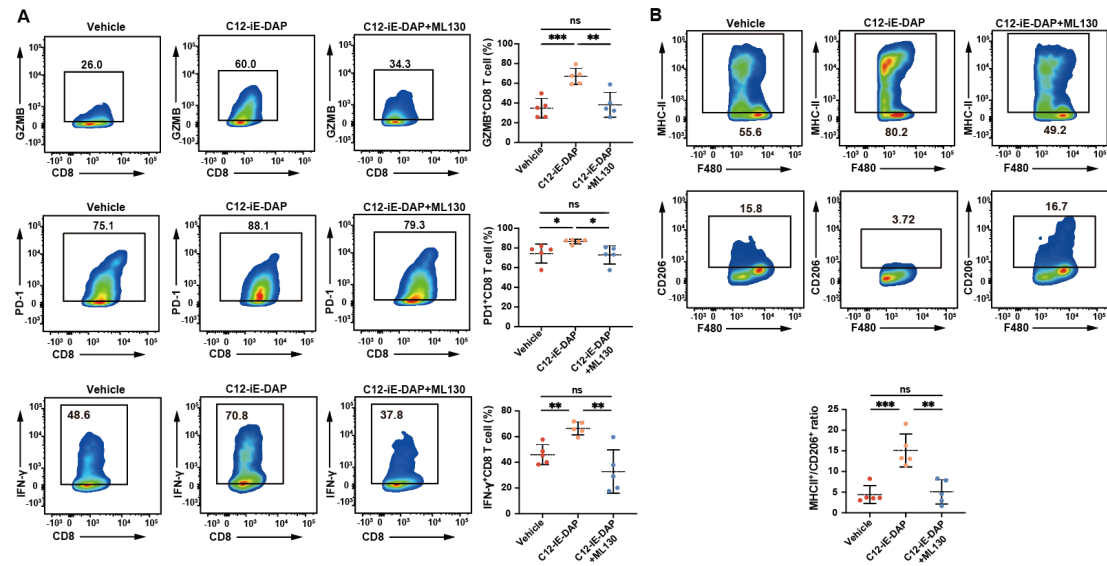

**Fig. S6. Flow cytometric analysis of orthotopic HCC tumors treated with either C12-iE-DAP, C12-iE-DAP + ML130, or vehicle.** (A) The representative data and statistical diagram of the percentages of GZMB<sup>+</sup>, PD-1<sup>+</sup> or IFN- $\gamma$ <sup>+</sup> CD8<sup>+</sup> T-cells are shown (n=5 each). (B) The representative data and statistical diagram of the MHC II: CD206 positive rates ratios of macrophages are shown (n=5 each). Statistical analysis was performed using the Student's t-test. Data was presented as mean with SD. ns, no significance; \* $p$ <0.05, \*\* $p$ <0.01, \*\*\* $p$ <0.001. HCC: hepatocellular carcinoma; GZMB: granzyme B; SD: standard deviation.

**Fig. S7**

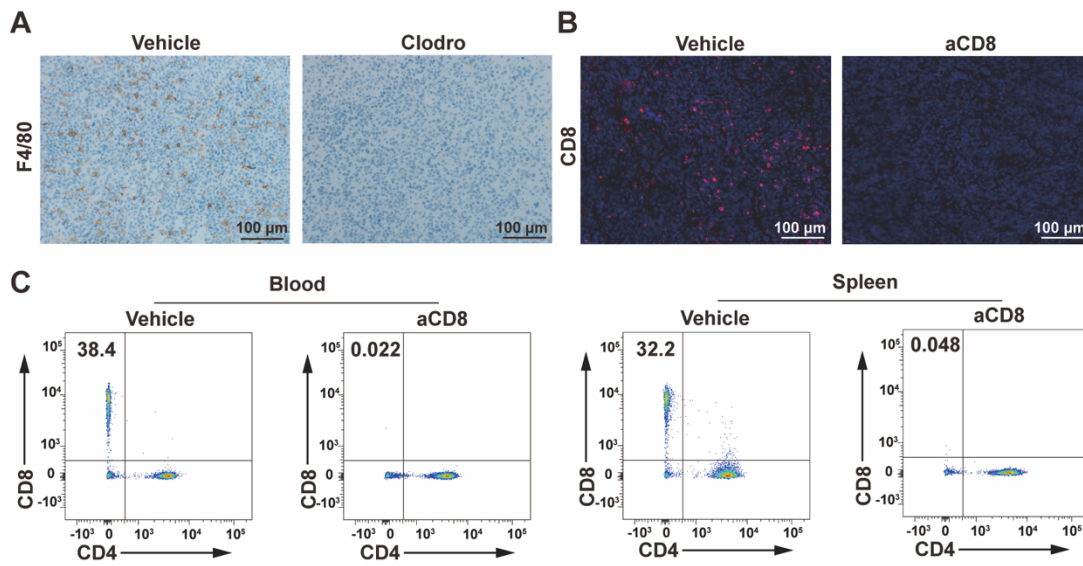

**Fig. S7. Validation of the in vivo depletion efficiency of Clodronate Liposome and anti-mouse CD8 $\alpha$  antibody.** (A) Representative IHC images of F4/80<sup>+</sup> macrophages in Hepa 1-6 tumors treated with either vehicle or Clodronate Liposomes. Scale bar: 100  $\mu$ m. (B) Representative IF images of CD8<sup>+</sup> T-cells in Hepa 1-6 tumors treated with either vehicle or depleting anti-CD8 antibody. Scale bar: 100  $\mu$ m. (C) Flow cytometric analysis of blood (left panel) and spleens (right panel) from C57BL/6 mice treated with either vehicle or depleting anti-CD8 antibody. The proportions of CD8<sup>+</sup> T-cells are shown. IHC: immunohistochemistry; IF: immunofluorescence.

Fig. S8

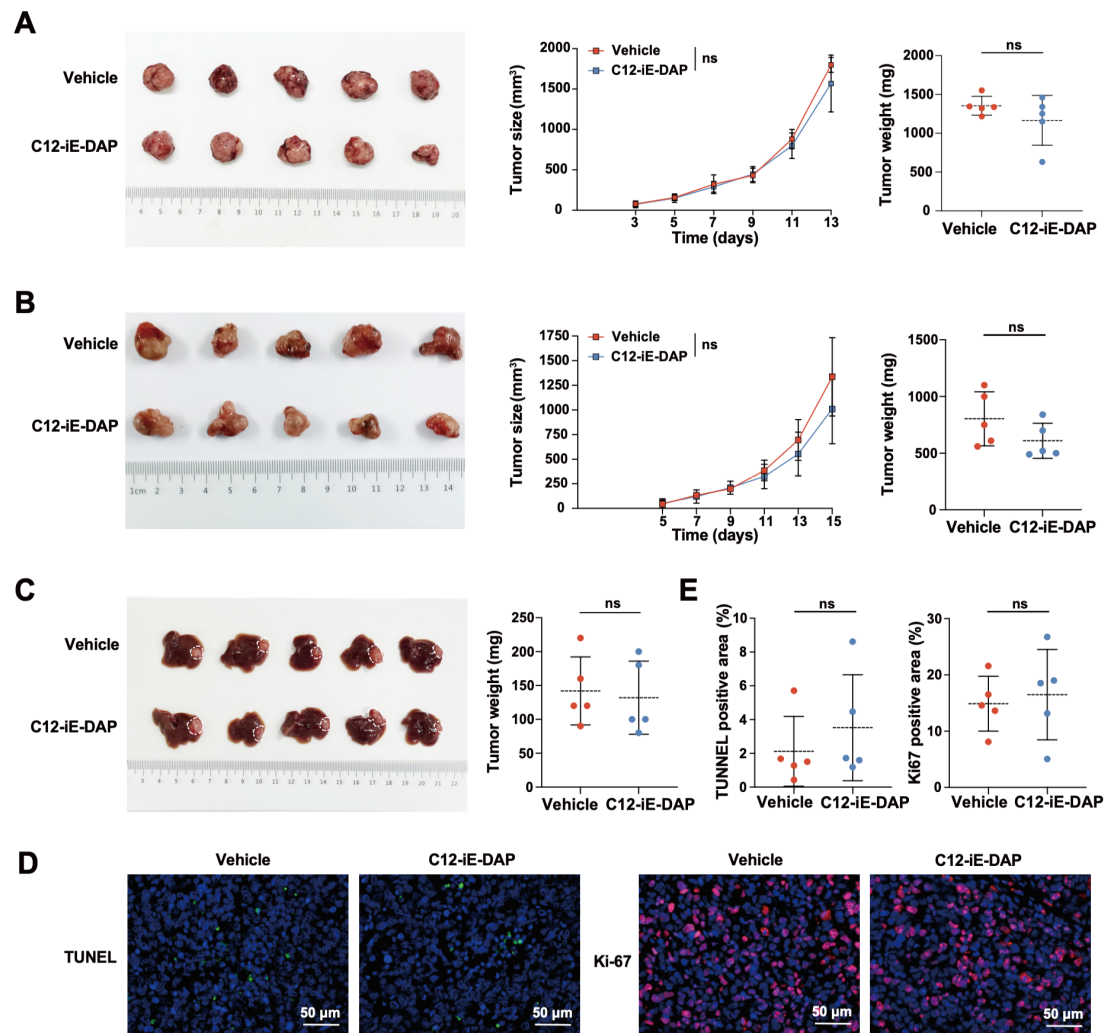

**Fig. S8. Effect of the NOD1 agonist, C12-iE-DAP on tumor growth in immune-deficient SCID or BALB/c nude mice.** (A) Tumor growth curves and tumor weights of HCC tumors from SCID mice treated intraperitoneally with either vehicle or C12-iE-DAP (25  $\mu$ g/injection, every other day, n=5 each). (B) Tumor growth curves and tumor weights of BALB/c nude mice inoculated subcutaneously with Hepa 1-6 cells, treated with either vehicle or C12-iE-DAP (n=5 each). (C) Representative pictures (left panel) and tumor weights (right panel) of orthotopic HCC of BALB/c nude mice inoculated with Hepa 1-6 cells, treated with either vehicle or C12-iE-DAP (n=5 each). (D-E) Representative pictures (D) and statistical diagrams (E) depicting the immunofluorescence

staining of TUNEL and Ki67 in orthotopic HCC treated with either vehicle or C12-iE-DAP (n=5 each). Scale bar: 50  $\mu$ m. Statistical analysis was performed using the Student's t-test. Data was presented as mean with SD. ns, no significance. SCID: severe combined immunodeficiency; HCC: hepatocellular carcinoma; SD: standard deviation.

**Fig. S9**

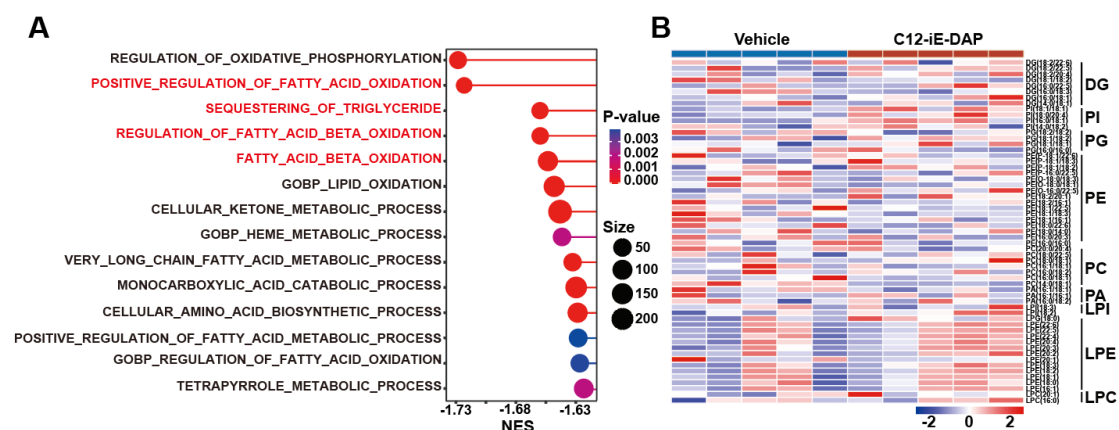

**Fig. S9. NOD1 activation regulates fatty acid metabolism in TAMs.** (A) GSEA enrichment analysis of NOD1<sup>+</sup> TAMs using scRNA-seq data from HCC patients (GSE140228). NOD1<sup>+</sup> TAMs were stratified into either NOD1-low or NOD1-high TAMs based on the median value of NOD1 expression. (B) Metabolomics analysis of diacylglycerol and major structural lipids in TAMs treated with either vehicle or C12-iE-DAP (400 ng/ml) for 24 h. TAM: tumor-associated macrophage; GSEA: Gene Set Enrichment Analysis; scRNA-seq: single-cell RNA sequencing; HCC: hepatocellular carcinoma; DG: diacylglycerol; PI: phosphatidylinositol; PG: phosphatidylglycerol; PE: phosphatidylethanolamine; PC: phosphatidylcholine; PA: phosphatidic acid; LPI: lysophosphatidylinositol; LPE: lysophosphatidylethanolamine; LPC: lysophosphatidylcholine; NES: Normalized Enrichment Score.

Fig. S10

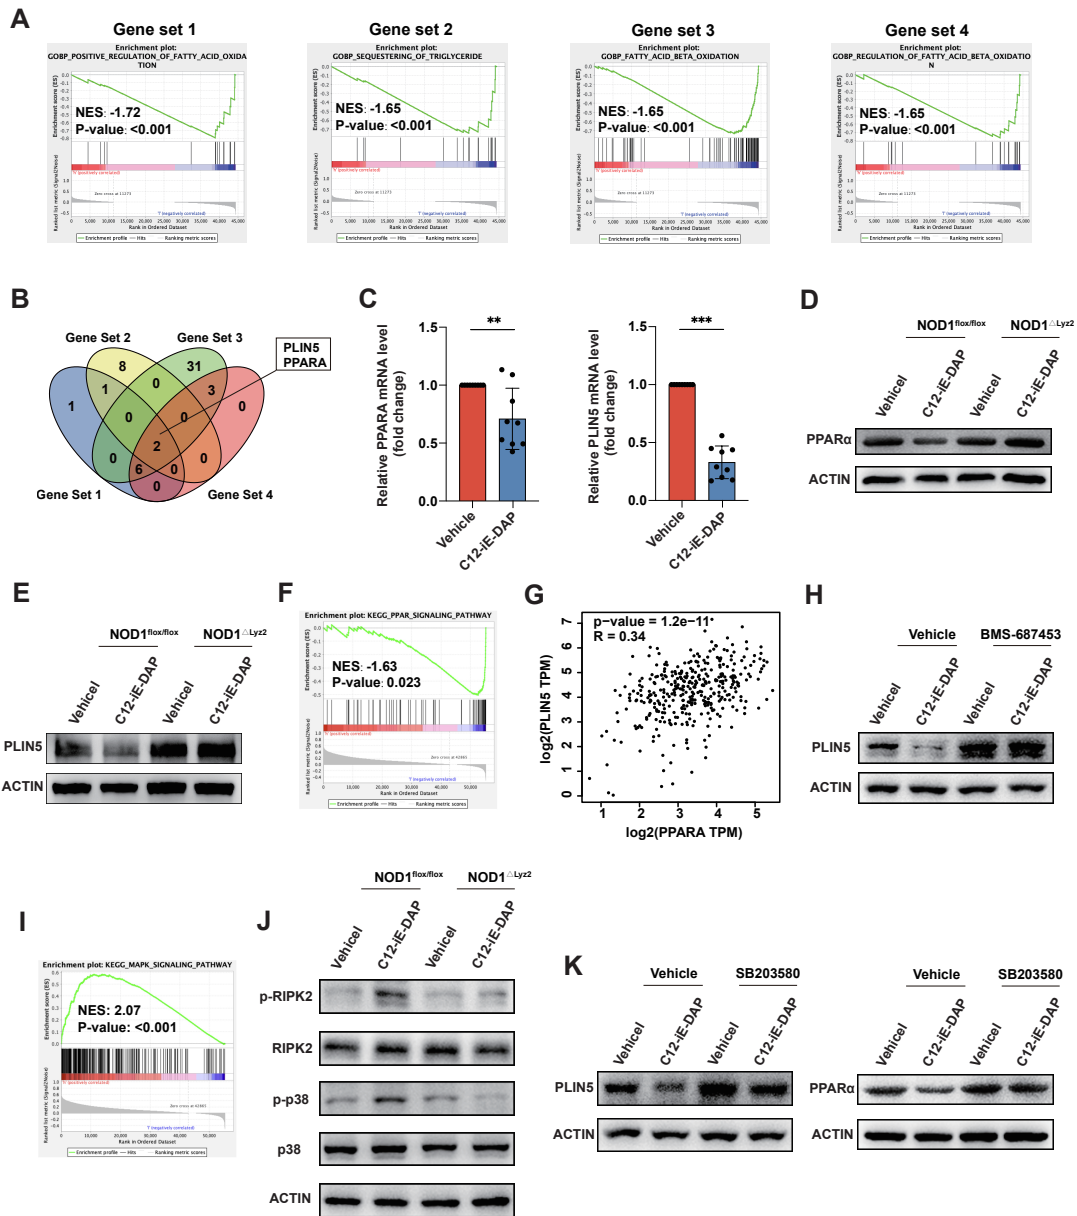

**Fig. S10. NOD1 activation decreases PLIN5 expression by p38/PPAR $\alpha$  pathway in TAMs.** (A) GSEA plots of the top four differential lipid metabolism-related pathways between NOD1-low and NOD1-high TAMs in HCC (GSE140228). (B) Venn diagram showing the intersection of gene sets involved in the top four pathways enriched for lipid metabolism. (C) qPCR analysis of the mRNA levels of *PPAR $\alpha$*  (left panel) and *PLIN5* (right panel) in TAMs treated with either vehicle or C12-IE-DAP (400 ng/ml) for 24 h. (D-E) The protein levels of PPAR $\alpha$  (D) and PLIN5 (E) in TAMs that

were generated from NOD1<sup>flox/flox</sup> or NOD1<sup>ΔLyz2</sup> mice and treated with either vehicle or C12-iE-DAP (400 ng/ml). (F) GSEA analysis of TCGA-LIHC demonstrates the downregulation of PPAR signaling pathway in NOD1-high HCC compared to NOD1-low HCC. (G) Spearman correlation analysis of *PPARA* and *PLIN5* expressions using TCGA-LIHC. (H) The protein levels of PLIN5 in TAMs that pre-treated with vehicle or PPAR $\alpha$  agonist (BMS-687453, 500 nM) for 12 h, and then treated with either vehicle or C12-iE-DAP (400 ng/ml) for 24 h. (I) GSEA analysis of TCGA-LIHC demonstrates the upregulation of MAPK signaling pathway in NOD1-high HCC compared to NOD1-low HCC. (J) The protein levels of p38, phosphorylated p38, RIPK2 and phosphorylated RIPK2 in TAMs that were generated from NOD1<sup>flox/flox</sup> or NOD1<sup>ΔLyz2</sup> mice and treated with either vehicle or C12-iE-DAP (400 ng/ml). (K) The protein levels of PPAR $\alpha$  (left panel) and PLIN5 (right panel) in TAMs that pre-treated with vehicle or p38 inhibitor (SB203580, 10  $\mu$ M) for 12 h, and then treated with either vehicle or C12-iE-DAP (400 ng/ml) for 24 h. Statistical analysis was performed using the Student's t-test. Data was presented as mean with SD. ns, no significance; \*\* $p$ <0.01, \*\*\* $p$ <0.001. PLIN5: perilipin 5; PPAR $\alpha$ : Peroxisome Proliferator-Activated Receptor  $\alpha$ ; GSEA: Gene Set Enrichment Analysis; TAM: tumor-associated macrophage; HCC: hepatocellular carcinoma; TCGA-LIHC: The Cancer Genome Atlas Liver Hepatocellular Carcinoma; MAPK: Mitogen-Activated Protein Kinase; RIPK2: Receptor-Interacting Protein Kinase 2; SD: standard deviation; NES: Normalized Enrichment Score.

Fig. S11

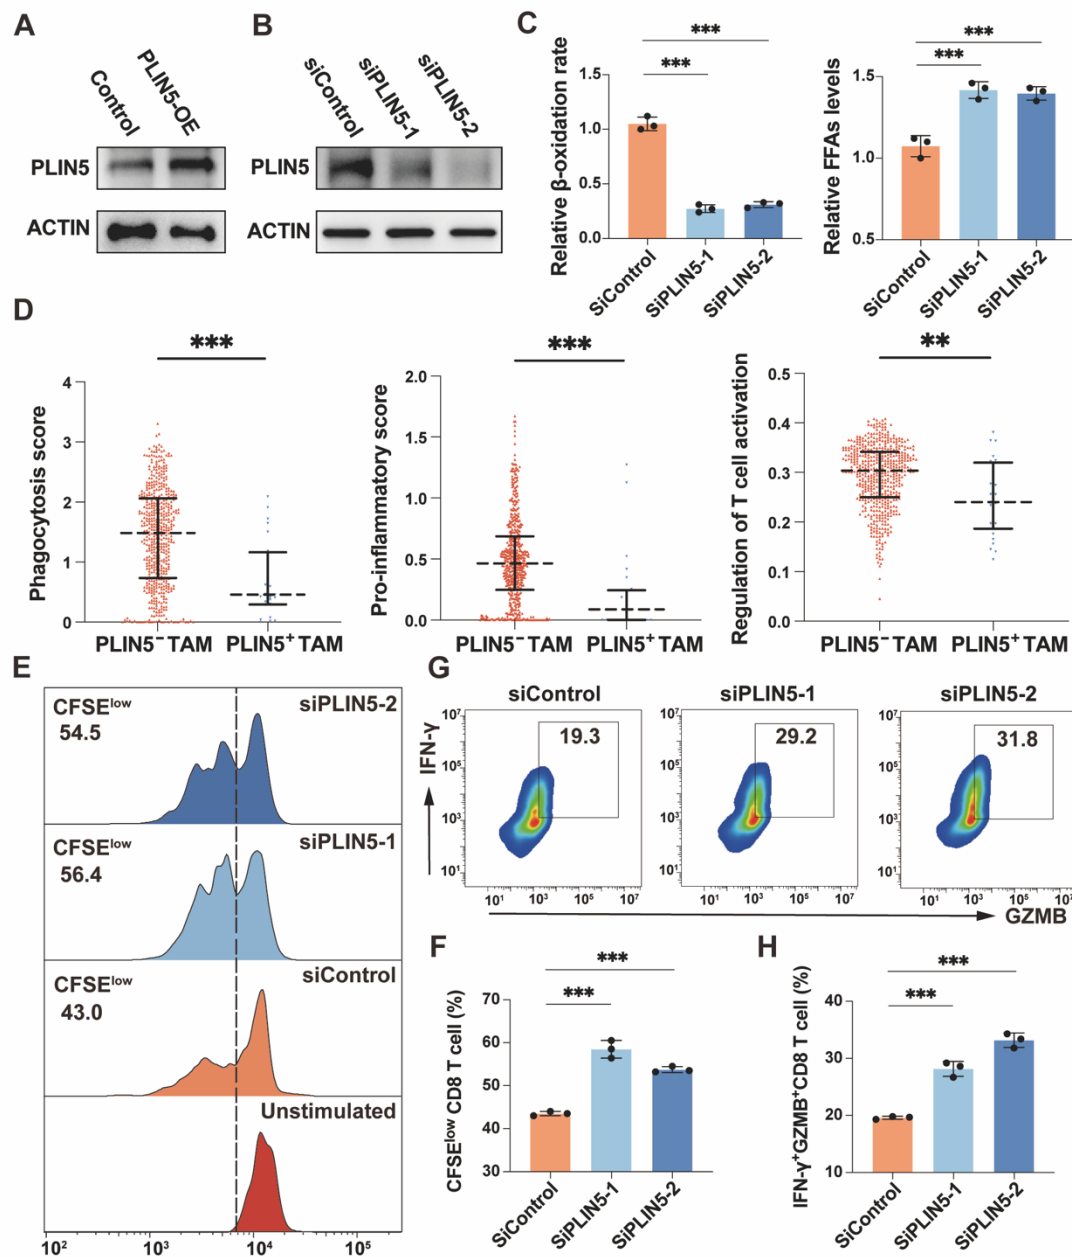

**Fig. S11. PLIN5 modulates the immunostimulatory function of TAMs.** (A) PLIN5 protein levels in TAMs transfected with either control or PLIN5-overexpression plasmids. (B) PLIN5 protein levels in TAMs transfected with either control siRNA or siRNA targeting PLIN5. (C)  $\beta$ -oxidation rate (left panel) and FFA levels (right panel) were measured in TAMs transfected with either control siRNA or siRNA targeting PLIN5. (D) The expression-based scores for phagocytosis, pro-inflammatory score, and regulation of T cell activation were measured in TAMs transfected with either control siRNA or siRNA targeting PLIN5. (E) CFSE flow cytometry histograms were measured in TAMs transfected with either control siRNA or siRNA targeting PLIN5. (F) The percentage of CFSE<sup>low</sup> CD8 T cells was measured in TAMs transfected with either control siRNA or siRNA targeting PLIN5. (G) Flow cytometry plots were measured in TAMs transfected with either control siRNA or siRNA targeting PLIN5. (H) The percentage of IFN- $\gamma$ <sup>+</sup>GZMB<sup>+</sup> CD8 T cells was measured in TAMs transfected with either control siRNA or siRNA targeting PLIN5.



inflammatory response, and regulation of T-cell activation were calculated in PLIN5<sup>-</sup> TAMs and PLIN5<sup>+</sup> TAMs using scRNA-seq data from HCC patients (GSE140228). (E-F) T-cell proliferation assay. Splenic CD8<sup>+</sup> T-cells were co-cultured with TAMs transfected with either control siRNA or siRNA targeting PLIN5. The percentage of CFSE low population represents the frequencies of proliferating CD8<sup>+</sup> T-cells. Representative flow cytometry data (E) and the statistical diagram (F) are shown. (G-H) Analysis of IFN- $\gamma$ <sup>+</sup> GZMB<sup>+</sup> CD8<sup>+</sup> T-cells after co-culturing with TAMs transfected with either control siRNA or siRNA targeting PLIN5. Representative flow cytometry data (G) and the statistical diagram (H) are shown. Statistical analysis was performed using the Student's t-test (or the Mann-Whitney U test in D). Data was presented as mean with SD (or median with IQR in D). \*\* $p < 0.01$ , \*\*\* $p < 0.001$ . PLIN5: Perilipin 5; TAM: tumor-associated macrophage; siRNA: small interfering RNA; FFA: free fatty acid; scRNA-seq: single-cell RNA sequencing; CFSE: carboxyfluorescein succinimidyl ester; IFN- $\gamma$ : interferon- $\gamma$ ; GZMB: granzyme B; OE: overexpression; SD: standard deviation; IQR: interquartile range.

Fig. S12

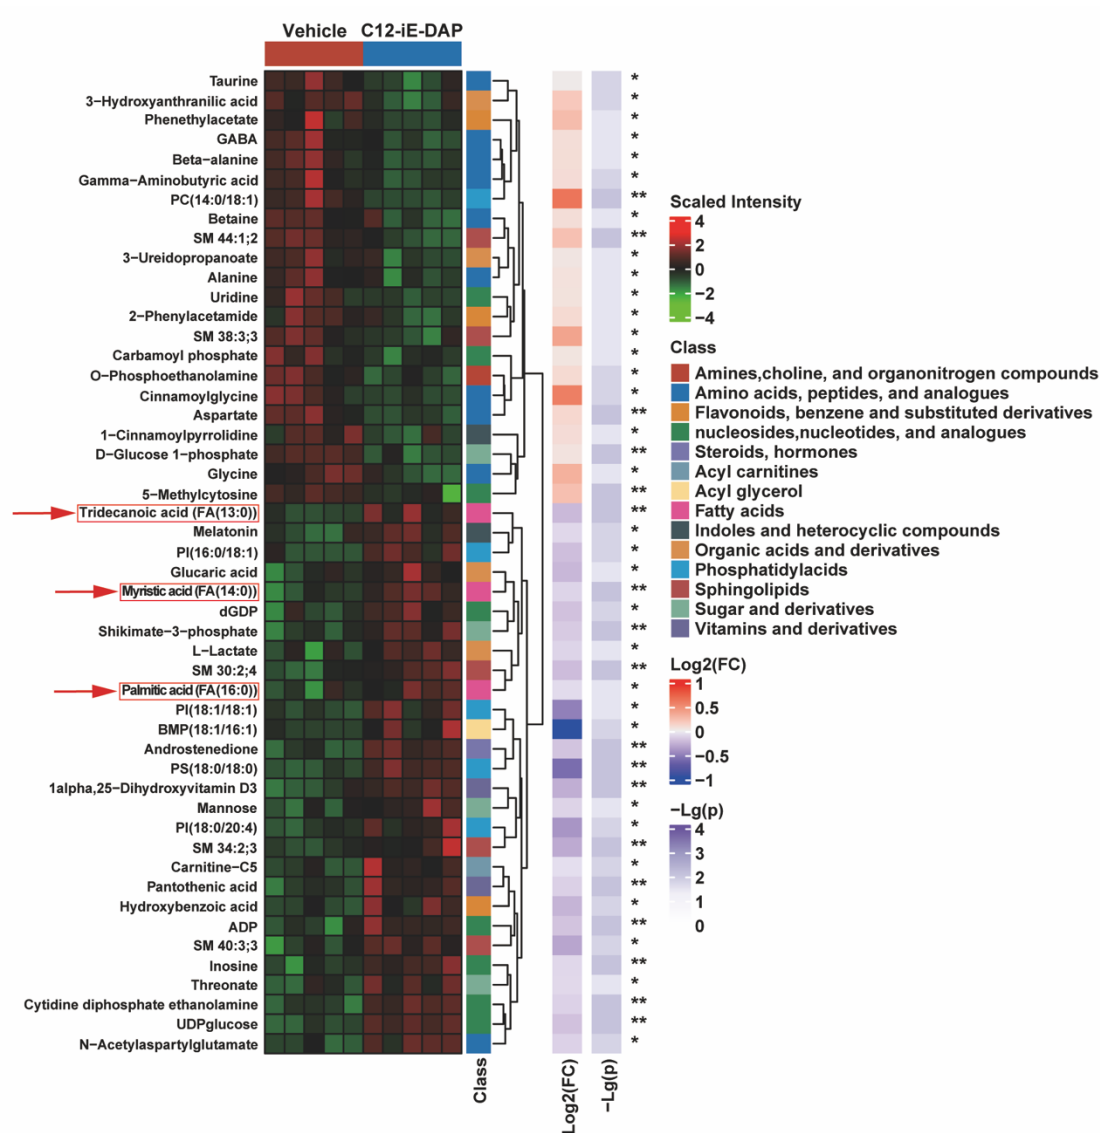

**Fig. S12. Hierarchical clustering analysis of differentially expressed metabolites in TAMs treated with either vehicle or C12-iE-DAP.** Statistical analysis was performed using the Mann-Whitney U test. \* $p < 0.05$ , \*\* $p < 0.01$ . TAM: tumor-associated macrophage; GABA:  $\gamma$ -aminobutyric acid; PC: phosphatidylcholine; SM: sphingomyelin; FA: fatty acid; PI: phosphatidylinositol; BMP: bis (monoacylglycero) phosphate; PS: phosphatidylserine; FC: fold change.

**Fig. S13**

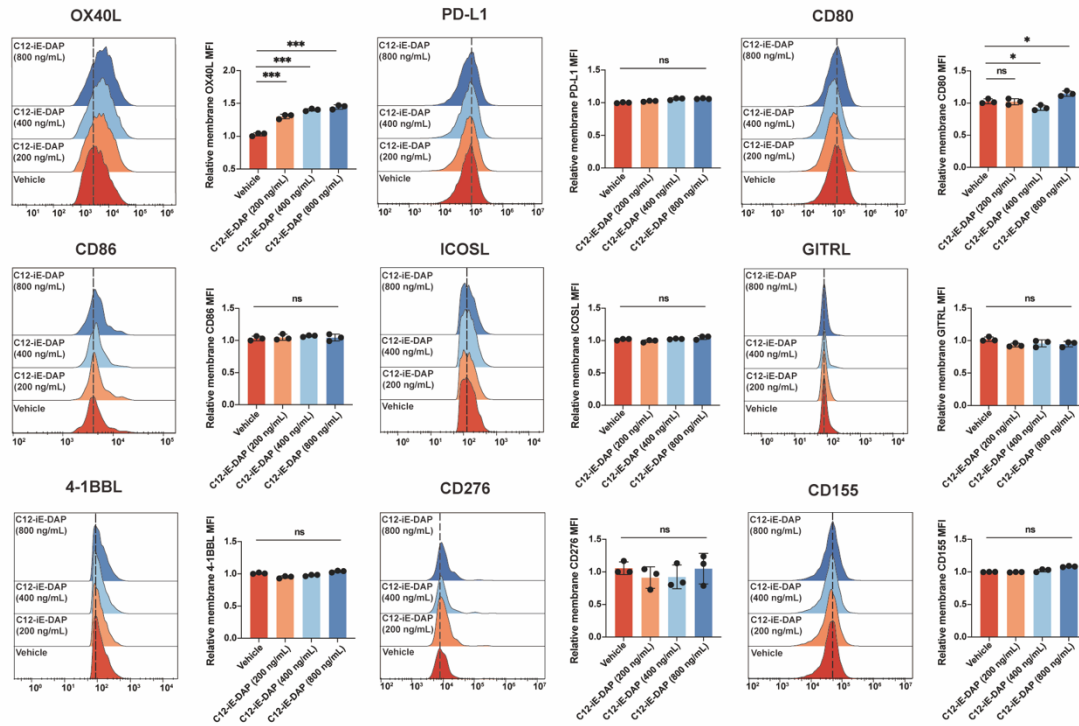

**Fig. S13. Flow cytometric analysis of ligands with co-stimulatory or inhibitory activities on**

**TAMs treated with either vehicle or C12-iE-DAP. Statistical analysis was performed using the**

**Student's t-test. Data was presented as mean with SD. ns, no significance; \* $p < 0.05$ , \*\*\* $p < 0.001$ .**

**TAM: tumor-associated macrophage; SD: standard deviation.**

**Fig. S14**

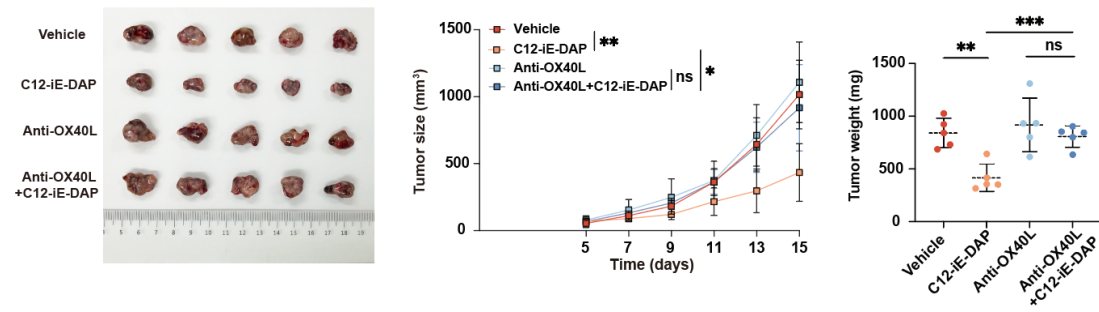

**Fig. S14. Tumor growth curves and tumor weights of HCC tumors treated intraperitoneally with either vehicle or C12-iE-DAP (25  $\mu$ g/injection) in control or OX40L blockade C57BL/6 mice (n=5, each).** Statistical analysis was performed using the Student's t-test. Data was presented as mean with SD. ns, no significance; \* $p$ <0.05, \*\* $p$ <0.01, \*\*\* $p$ <0.001. HCC: hepatocellular carcinoma.

Fig. S15

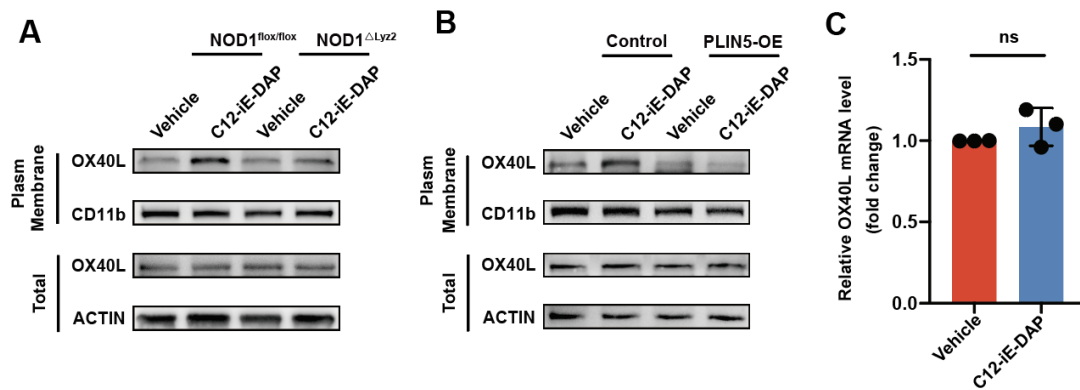

**Fig. S15. NOD1 activation promotes OX40L membrane expression in TAMs.** (A) Western blot analysis of total OX40L and membrane OX40L expression on TAMs generated from *NOD1<sup>flox/flox</sup>* or *NOD1<sup>ΔLyz2</sup>* mice and treated with either vehicle or C12-iE-DAP.  $\beta$ -actin and CD11b were used as loading controls. (B) Western blot analysis of total OX40L and membrane OX40L expression on TAMs transfected with either control or PLIN5-overexpression plasmids, followed by treatment with either vehicle or C12-iE-DAP.  $\beta$ -actin and CD11b were used as loading controls. (C) qPCR analysis of the mRNA levels of OX40L in TAMs treated with either vehicle or C12-iE-DAP. Statistical analysis was performed using the Student's t-test. Data was presented as mean with SD. ns, no significance. TAM: tumor-associated macrophage; PLIN5: perilipin 5; OE: overexpression; SD: standard deviation.

Fig. S16

A

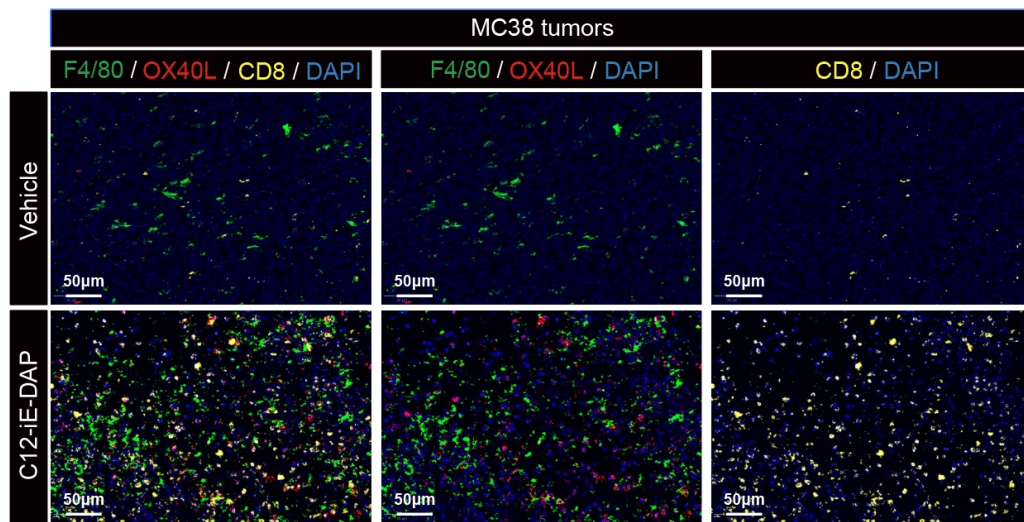

B

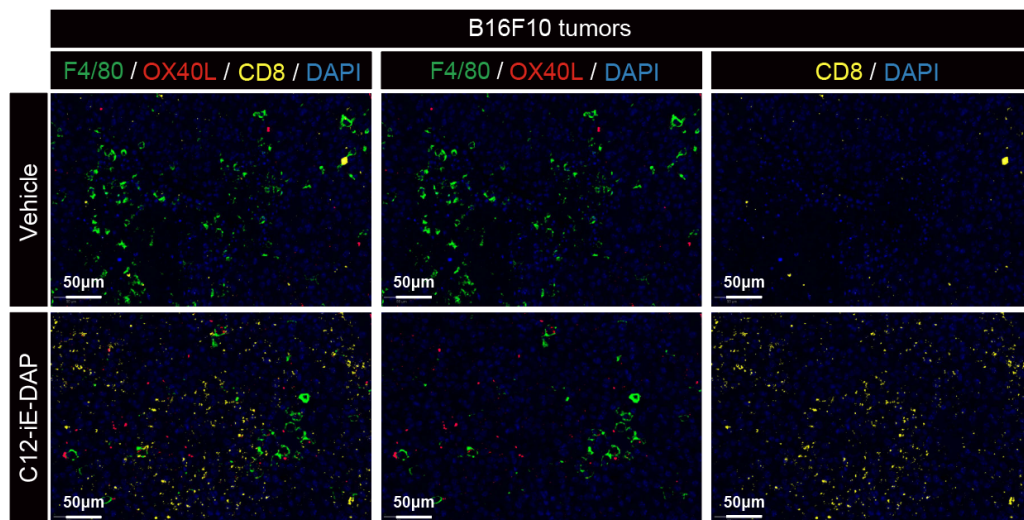

**Fig. S16. mIF analysis of OX40L<sup>+</sup> TAMs and CD8<sup>+</sup> T cells in B16F10 melanoma and MC38 colon carcinoma treated with either vehicle or C12-iE-DAP. (A) Representative pictures of mIF analysis for F4/80, OX40L, and CD8 markers in the MC38 tumors treated with either vehicle or C12-iE-DAP. Scale bar: 50 µm. (B) Representative pictures of mIF analysis for F4/80, OX40L, and CD8 markers in the B16F10 tumors treated with either vehicle or C12-iE-DAP. Scale bar: 50 µm. mIF: multiplex immunofluorescence; TAM: tumor-associated macrophage.**

Fig. S17

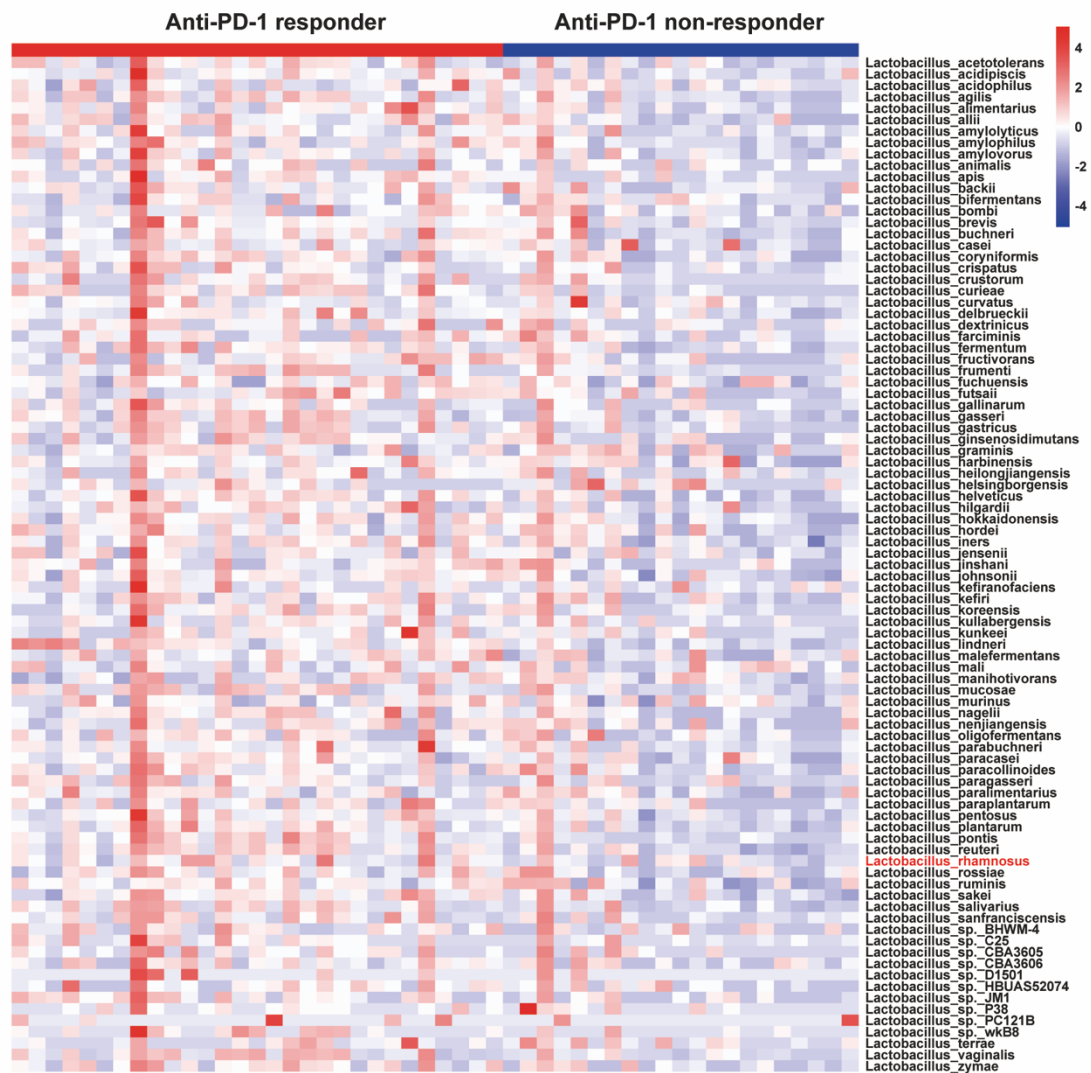

Fig. S17. Heatmap depicting the relative abundance of iE-DAP-bearing *Lactobacillus* between fecal samples from anti-PD-1 responding (n=29) and non-responding (n=21) HCC patients.

The color gradient represents the normalized Z scores of each gene across samples, ranging from low (blue) to high (red). *Lactobacillus rhamnosus* GG is highlighted in red.

Fig. S18

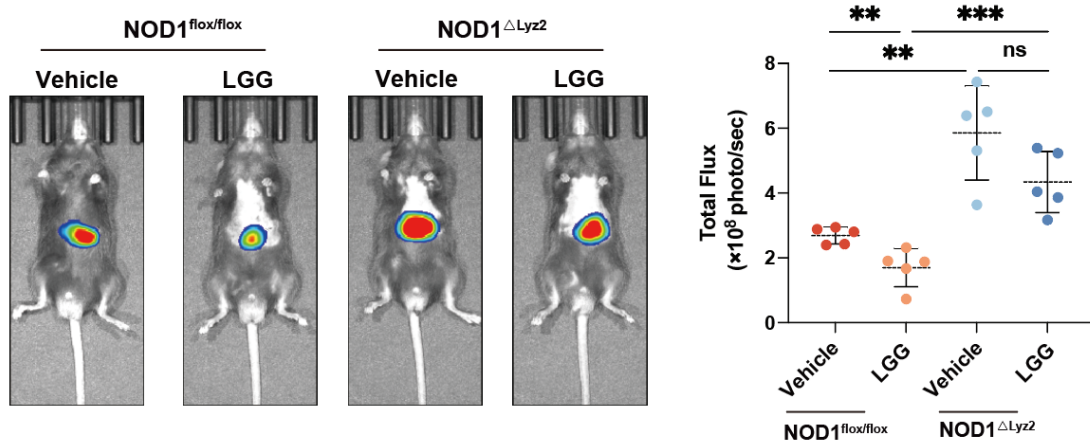

**Fig. S18. Orthotopic HCC tumors growing in NOD1<sup>flox/flox</sup> versus NOD1<sup>ΔLyz2</sup> mice administrated orally with either PBS or LGG (n=5 each).** Statistical analysis was performed using the Student's t-test. Data was presented as mean with SD. ns, no significance; \*\*p<0.01; \*\*\*p<0.001. HCC: hepatocellular carcinoma; LGG: Lactobacillus rhamnosus GG; SD: standard deviation.



**Table S1. Antibodies used for flow cytometry.**

| <b>Antibody</b>          | <b>Clone</b> | <b>Company</b> |
|--------------------------|--------------|----------------|
| anti-human CD45          | HI30         | eBioscience    |
| anti-human CD11b         | M1/70        | BD             |
| anti-human CD68          | Y1/82A       | BioLegend      |
| anti-human NOD1          | 3F10         | US Biological  |
| anti-human CD3           | SK7          | BD             |
| anti-human CD4           | RPA-T4       | eBioscience    |
| anti-human CD8           | RPA-T8       | eBioscience    |
| anti-human CD25          | BC96         | eBioscience    |
| anti-human CD127         | HIL-7R-M21   | BD             |
| anti-human CD19          | SJ25C1       | BioLegend      |
| anti-human CD56          | B159         | BD             |
| anti-human Ki-67         | SolA15       | eBioscience    |
| anti-human Perforin      | dG9          | BioLegend      |
| anti-human Granzyme B    | GB11         | BioLegend      |
| anti-human PD-1          | NAT105       | BioLegend      |
| anti-human CTLA-4        | 14D3         | eBioscience    |
| anti-human TIGIT         | 741182       | BD             |
| anti-mouse CD45          | 30-F11       | BD             |
| anti-mouse CD3           | 145-2C11     | BioLegend      |
| anti-mouse CD8           | 53-6.7       | BioLegend      |
| anti-mouse IFN- $\gamma$ | XMG1.2       | BioLegend      |
| anti-mouse Granzyme B    | NGZB         | eBioscience    |
| anti-mouse PD-1          | 29F.1A12     | BioLegend      |
| anti-mouse CD11b         | M1/70        | BioLegend      |
| anti-mouse F4/80         | T45-2342     | BD             |
| anti-mouse CD206         | C068C2       | BioLegend      |
| anti-mouse MHC-II        | M5/114.15.2  | eBioscience    |
| anti-mouse OX40L         | RM134L       | BioLegend      |
| anti-mouse PD-L1         | MIH5         | eBioscience    |
| anti-mouse CD80          | 16-10A1      | BioLegend      |
| anti-mouse CD86          | GL-1         | BioLegend      |
| anti-mouse ICOSL         | HK5.3        | BioLegend      |
| anti-mouse GITRL         | YGL386       | BioLegend      |
| anti-mouse 4-1BBL        | TKS-1        | BioLegend      |
| anti-mouse B7-H3         | MIH35        | BioLegend      |
| anti-mouse CD155         | TX56         | BioLegend      |

**Table S2. Primers used for quantitative real-time PCR in this study.**

| Name           | Forward Sequence (5' to 3') | Reverse Sequence (3' to 5') |
|----------------|-----------------------------|-----------------------------|
| $\beta$ -actin | GGCTGTATTCCCCTCCATCG        | CCAGTTGGTAACAATGCCATGT      |
| Arg            | CTCCAAGCCAAAGTCCTTAGAG      | AGGAGCTGTCATTAGGGACATC      |
| Fizz           | CCAATCCAGCTAACTATCCCTCC     | ACCCAGTAGCAGTCATCCCA        |
| Il10           | GCTCTTACTGACTGGCATGAG       | CGCAGCTCTAGGAGCATGTG        |
| Mrc1           | CTCTGTTTCAGCTATTGGACGC      | CGGAATTTCTGGGATTCAGCTTC     |
| Il1b           | GCAACTGTTCTGAACCTCAACT      | ATCTTTTGGGGTCCGTCAACT       |
| Il6            | TAGTCCTTCTACCCCAATTTCC      | TTGGTCCTTAGCCACTCCTTC       |
| Il12b          | TGGTTTGCCATCGTTTTGCTG       | ACAGGTGAGGTTCACTGTTTTCT     |
| Tnfa           | CCCTCACACTCAGATCATCTTCT     | GCTACGACGTGGGCTACAG         |
| Ccl12          | ATTTCCACACTTCTATGCCCTCT     | ATCCAGTATGGTCTGAAGATCA      |
| Ccl8           | TCTACGCAGTGCTTCTTTGCC       | AAGGGGGATCTTCAGCTTTAGTA     |
| Cxcl2          | CCAACCACCAGGCTACAGG         | GCGTCACACTCAAGCTCTG         |
| Icam1          | GTGATGCTCAGGTATCCATCCA      | CACAGTTCTCAAAGCACAGCG       |
| Ido1           | GCTTTGCTCTACCACATCCAC       | CAGGCGCTGTAACCTGTGT         |
| Fasn           | GGAGGTGGTGATAGCCGGTAT       | TGGGTAATCCATAGAGCCCAG       |
| Acss2          | AAACACGCTCAGGGAAAATCA       | ACCGTAGATGTATCCCCCAGG       |
| Acsl4          | CTCACCATTATATTGCTGCCTGT     | TCTCTTTGCCATAGCGTTTTTCT     |
| Scd1           | TTCTTGCGATACTCTGGTGC        | CGGGATTGAATGTTCTTGTCGT      |
| Scap           | TGGAGCTTTTGAGACTCAGGA       | TCGATTAAGCAGGTGAGGTCCG      |
| Acaca          | GATGAACCATCTCCGTTGGC        | GACCCAATTATGAATCGGGAGTG     |
| Dgat1          | TCCGTCCAGGGTGGTAGTG         | TGAACAAAGAATCTTGCAGACGA     |
| Hadha          | TGCATTTGCCGCAGCTTTAC        | GTTGGCCCAGATTTCTGTTCA       |
| Cpt1a          | CTCCGCCTGAGCCATGAAG         | CACCAGTGATGATGCCATTCT       |
| Ppara          | AGAGCCCCATCTGTCCTCTC        | ACTGGTAGTCTGCAAACCAAAA      |
| Srebf1         | TGACCCGGCTATTCCGTGA         | CTGGGCTGAGCAATACAGTTC       |
| Cd36           | ATGGGCTGTGATCGGAACTG        | TTTGCCACGTCATCTGGGTTT       |
| Ldlr           | TGACTCAGACGAACAAGGCTG       | ATCTAGGCAATCTCGGTCTCC       |
| Mgl1           | CGGACTTCCAAGTTTTTGTGAGA     | GCAGCCACTAGGATGGAGATG       |
| Atgl           | GGATGGCGGCATTTTCAGACA       | CAAAGGGTTGGGTTGGTTCAG       |
| Hsl            | CCAGCCTGAGGGCTTACTG         | CTCCATTGACTGTGACATCTCG      |
| Lpl            | GGGAGTTTGGCTCCAGAGTTT       | TGTGTCTTCAGGGGTCCTTAG       |
| Plin1          | GGGACCTGTGAGTGCTTCC         | GTATTGAAGAGCCGGGATCTTTT     |
| Plin2          | GACCTTGTGTCCTCCGTTAT        | CAACCGCAATTTGTGGCTC         |
| Plin3          | ATGTCTAGCAATGGTACAGATGC     | CGTGGAAGTATAAGAGGCAGG       |
| Plin4          | GTGTCCACCAACTCACAGATG       | GGACCATTCTTTTGCAGCAT        |
| Plin5          | TGTCCAGTGCTTACAACCTCGG      | CAGGGCACAGGTAGTCACAC        |
| Ox40l          | AATCTGGAAAACGGATCAAGGC      | CAGGCAGACATAGATGAAGCAC      |
